# Supplementary material for: Site occupancy and photoluminescence properties of Eu3+-activated Ba2ZnB2O6 phosphor
Source: Royal Society of Chemistry journal article supplement (doi:10.1039/c4ra11516c), 2014-01-01
Supplement: c4ra11516c1.pdf [file c4ra11516c1.pdf]

## Site occupancy and photoluminescence properties of $\text{Eu}^{3+}$ -activated $\text{Ba}_2\text{ZnB}_2\text{O}_6$ phosphor

Huan Yi<sup>a</sup>, Fang Li<sup>a</sup>, Li Wu<sup>a,\*</sup>, Liwei Wu<sup>a</sup>, Hongrun Wang<sup>b</sup>, Biao Wang<sup>b</sup>, Yi Zhang<sup>b,\*</sup>, Yongfa Kong<sup>a</sup>,  
and Jingjun Xu<sup>a</sup>

a The MOE key laboratory of weak-Light Nonlinear Photonics, School of Physics, Nankai University, Tianjin 300071. Email: [lwu@nankai.edu.cn](mailto:lwu@nankai.edu.cn); Tel: +86-22-23506257, Fax: +86-22-23505409

b Institute of Photo-electronic Thin Film Devices and Technology and Tianjin Key Laboratory of Photo-electronic Thin Film Devices and Technology, Nankai University, Tianjin 300071, China. Email: [yizhang@nankai.edu.cn](mailto:yizhang@nankai.edu.cn), Tel: +86-22-23508572-8018, Fax: +86-22-23508912

Table S1. Fractional atomic coordinates and equivalent isotropic displacement parameters ( $\text{\AA}$ ) for  $\text{Ba}_2\text{ZnB}_2\text{O}_6:0.05\text{Eu}^{3+}$  together with the occupancy.

| Atom | Site | x          | y         | z          | Occupancy |
|------|------|------------|-----------|------------|-----------|
| Ba1  | 4 a  | 0.3836(4)  | 0.6723(3) | 0.3789(4)  | 1.0       |
| Ba2  | 4 a  | 0.3857(2)  | 0.2058(3) | 0.1685(3)  | 1.0       |
| Ba3  | 4 a  | 0.1134(4)  | 0.1312(2) | 0.1152(4)  | 1.0       |
| Ba4  | 4 a  | 0.0984(3)  | 0.6874(4) | 0.4074(2)  | 1.0       |
| Zn1  | 4 a  | 0.2313(3)  | 0.0108(4) | 0.4013(4)  | 0.975(3)  |
| Eu1  | 4 a  | 0.2313(3)  | 0.0108(4) | 0.4013(4)  | 0.025(3)  |
| Zn2  | 4 a  | 0.2097(4)  | 0.5061(4) | 0.1320 (3) | 0.972(3)  |
| Eu2  | 4 a  | 0.2097 (4) | 0.5061(4) | 0.1320(3)  | 0.028(3)  |
| B1   | 4 a  | 0.0179(3)  | 0.4369(5) | 0.1695(2)  | 1.0       |
| B2   | 4 a  | 0.2400(4)  | 0.8793(2) | 0.1520(7)  | 1.0       |
| B3   | 4 a  | 0.2277(3)  | 0.3588(4) | 0.4223(5)  | 1.0       |
| B4   | 4 a  | 0.0082(3)  | 0.0436(4) | 0.4125(3)  | 1.0       |
| O1   | 4 a  | 0.4683(4)  | 0.6893(5) | 0.1619(3)  | 1.0       |
| O2   | 4 a  | 0.4792(3)  | 0.4630(5) | 0.2613(3)  | 1.0       |
| O3   | 4 a  | 0.0902(2)  | 0.4674(4) | 0.0990(3)  | 1.0       |
| O4   | 4 a  | 0.2508(3)  | 0.8505(5) | 0.0189(5)  | 1.0       |
| O5   | 4 a  | 0.2386(4)  | 0.7233(3) | 0.2312(4)  | 1.0       |
| O6   | 4 a  | 0.2751(2)  | 0.9702(2) | 0.2312(3)  | 1.0       |
| O7   | 4 a  | 0.2181(3)  | 0.4733(4) | 0.4982(3)  | 1.0       |
| O8   | 4 a  | 0.2400(3)  | 0.3177(4) | 0.3007(3)  | 1.0       |
| O9   | 4 a  | 0.2510(4)  | 0.2347(4) | 0.4874(3)  | 1.0       |
| O10  | 4 a  | 0.0207(3)  | 0.8684(3) | 0.0058(3)  | 1.0       |
| O11  | 4 a  | 0.4607(3)  | 0.0924(3) | 0.3809(5)  | 1.0       |
| O12  | 4 a  | 0.0930(3)  | 0.0049(4) | 0.3933(4)  | 1.0       |
